# Supplementary material for: Novel Tripodal Polyamine Tris-Pyrene: DNA/RNA Binding and Photodynamic Antiproliferative Activity
Source: MDPI journal article supplement (doi:10.3390/pharmaceutics15092197), 2023-08-25
Supplement: s1 [file s1]

## Supporting information

# Novel Tripodal Polyamine Tris-Pyrene: DNA/RNA Binding and Photodynamic Antiproliferative Activity

Marta Jurković <sup>1</sup>, Marijana Radić Stojković <sup>1</sup>, Ksenija Božinović <sup>2</sup>, Davor Nestić <sup>2</sup>, Dragomira Majhen <sup>2</sup>, Estefanía Delgado-Pinar <sup>3</sup>, Mario Inclán <sup>3,4</sup>, Enrique García-España <sup>3,\*</sup> and Ivo Piantanida <sup>1,\*</sup>

<sup>1</sup> Division of Organic Chemistry and Biochemistry, Ruđer Bošković Institute, Bijenička Cesta 54, 10000 Zagreb, Croatia; marta.koscak@irb.hr (M.J.); mradic@irb.hr (M.R.S.)

<sup>2</sup> Division of Molecular Biology, Ruđer Bošković Institute, Bijenička Cesta 54, 10000 Zagreb, Croatia;

ksenija.bozinovic@irb.hr (K.B.); davor.nestic@irb.hr (D.N.); dragomira.majhen@irb.hr (D.M.)

<sup>3</sup> Department of Inorganic Chemistry, Institute for Molecular Science, University of Valencia, Catedrático Jose Beltrán 2, 46980 Paterna, Spain; estefania.delgado@uv.es (E.D.-P.); mario.inclan@uv.es (M.I.)

<sup>4</sup> Escuela Superior de Ingeniería, Ciencia y Tecnología, Universidad Internacional de Valencia (VIU), 46002 Valencia, Spain

\* Correspondence: enrique.garcia-es@uv.es (E.G.-E.); pianta@irb.hr (I.P.)

## Contents

|                                   |   |
|-----------------------------------|---|
| Synthesis .....                   | 2 |
| Chemico-physical properties ..... | 5 |
| Interactions with DNA/RNA .....   | 8 |

## 1. Synthesis

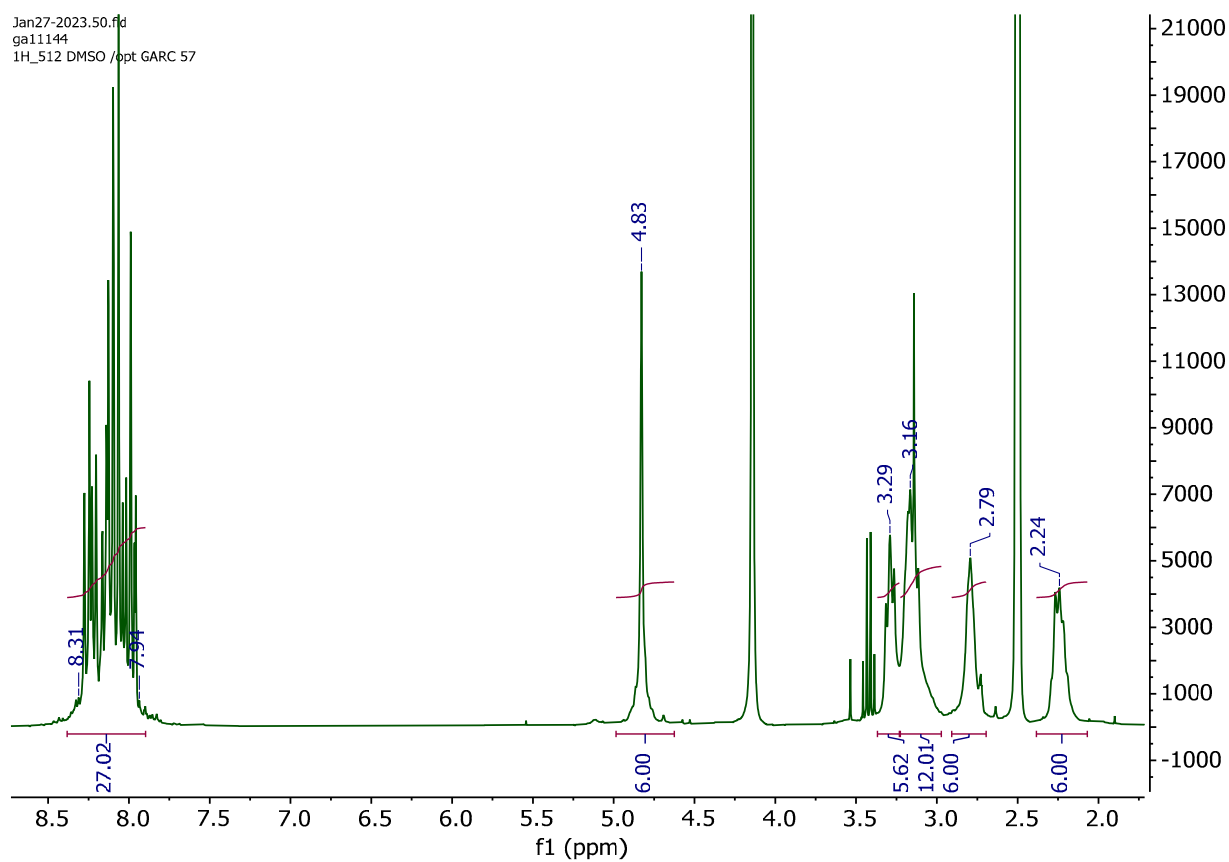

**Figure S1.**  $^1\text{H}$  NMR spectrum of **TAL3PYR** in DMSO: $\text{D}_2\text{O}$  3:1. Note: some ethanol is present in the sample.

Jan27-2023.51.fid  
ga111144  
c13cpd\_16k DMSO /opt GARC 57

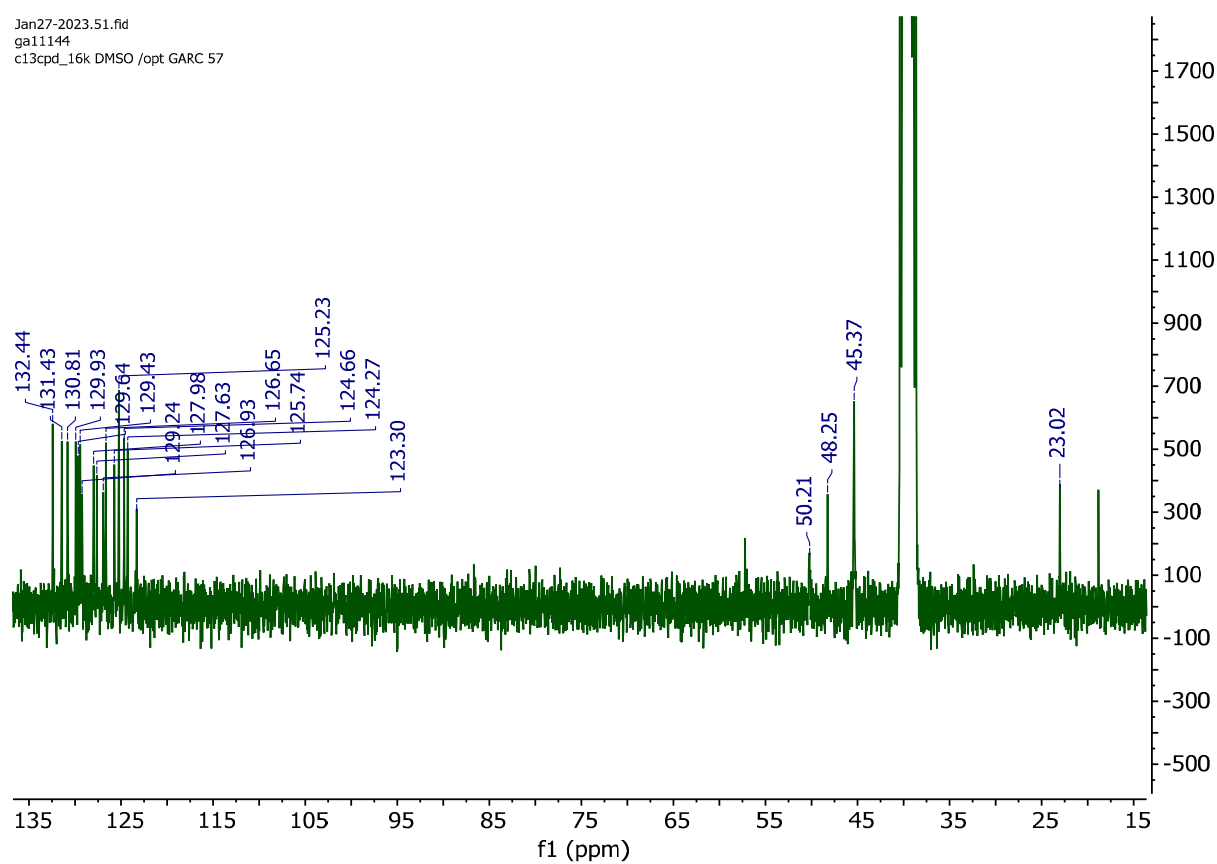

**Figure S2.** <sup>13</sup>C NMR spectrum of **TAL3PYR** in DMSO:D<sub>2</sub>O 3:1. Note: some ethanol is present in the sample.

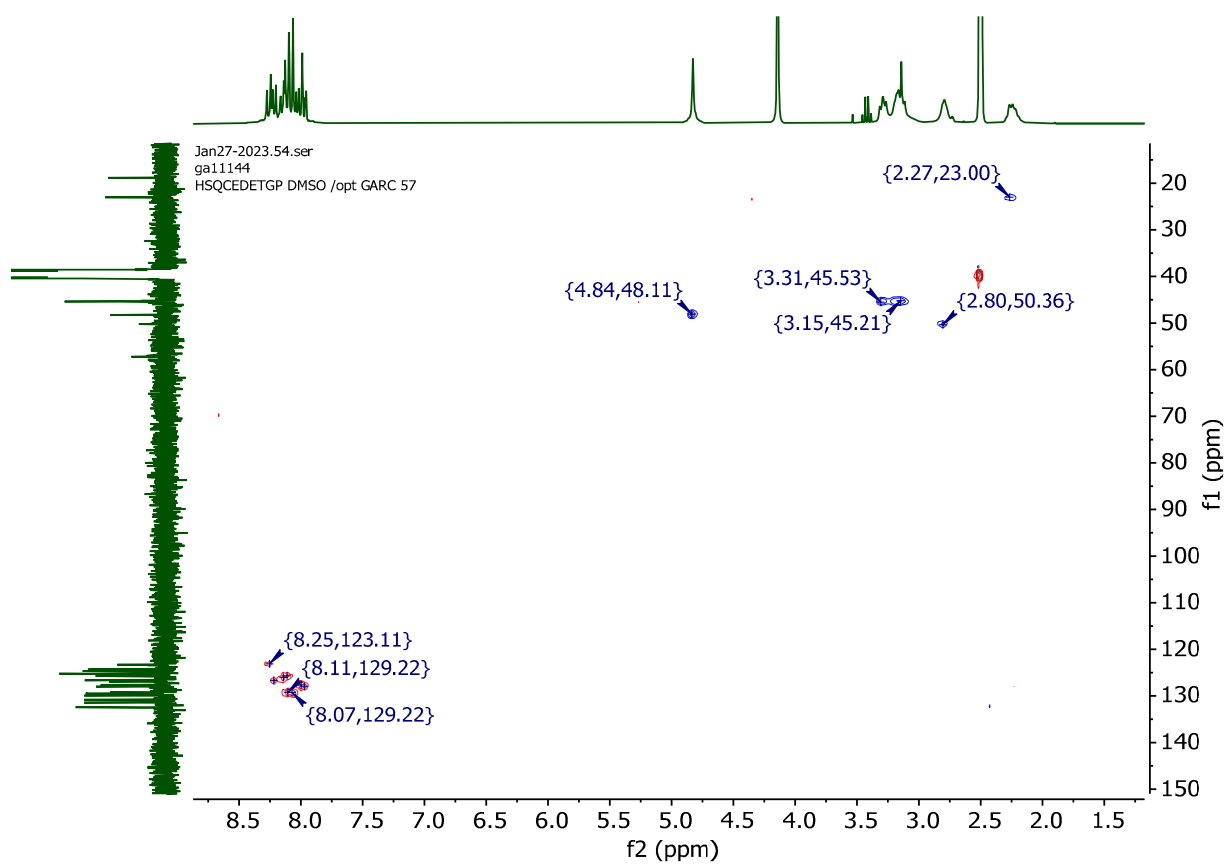

**Figure S3.** HSCQ NMR spectrum of **TAL3PYR** in DMSO:D<sub>2</sub>O 3:1.

## 2. Chemico-physical properties

**Table S1.** Electronic absorption data of **TAL3PYR** and **PYR**.

|                | $\lambda_{\max}$ / nm | $\varepsilon \times 10^3 / \text{mmol}^{-1} \text{cm}^2$ |
|----------------|-----------------------|----------------------------------------------------------|
| <b>TAL3PYR</b> | 236                   | 75.6                                                     |
|                | 280                   | 57.6                                                     |
|                | 334                   | 42.9                                                     |
|                | 351                   | 38.8                                                     |
| <b>PYR</b>     | 276                   | 62.1                                                     |
|                | 326                   | 41.5                                                     |
|                | 342                   | 59.7                                                     |

<sup>a</sup> Sodium cacodylate buffer,  $I = 0,05$  M, pH = 7,0.

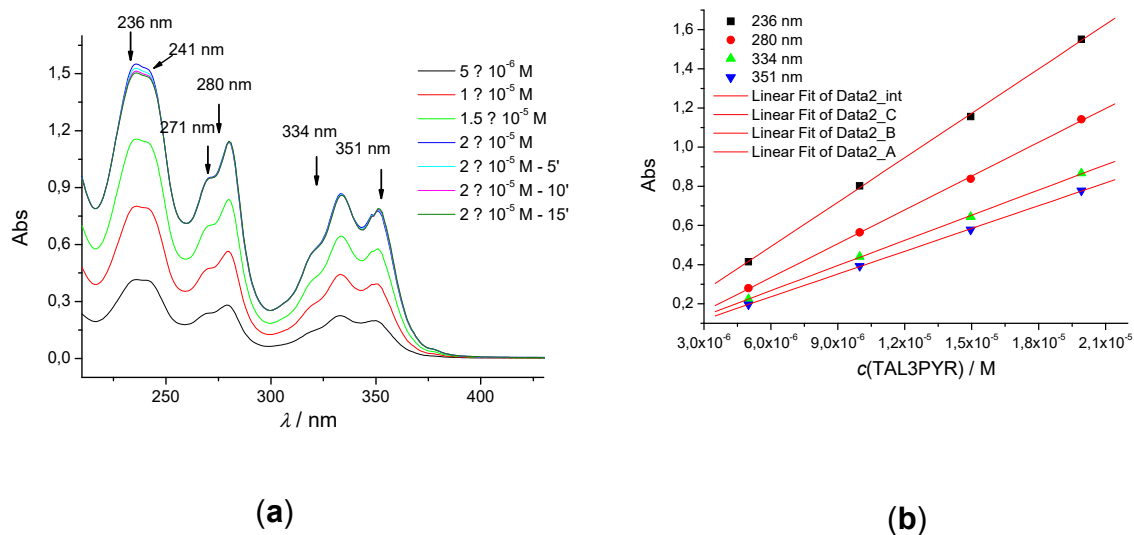

**Figure S4.** a) UV/Vis spectra changes of **TAL3PYR** at different concentrations (concentration range from  $5 \times 10^{-6}$ -  $2 \times 10^{-5}$  M); b) Dependence of Abs different  $\lambda_{\max}$  on  $c(\text{TAL3PYR})$ , at pH=7, sodium cacodylate buffer,  $I=0.05$  M.

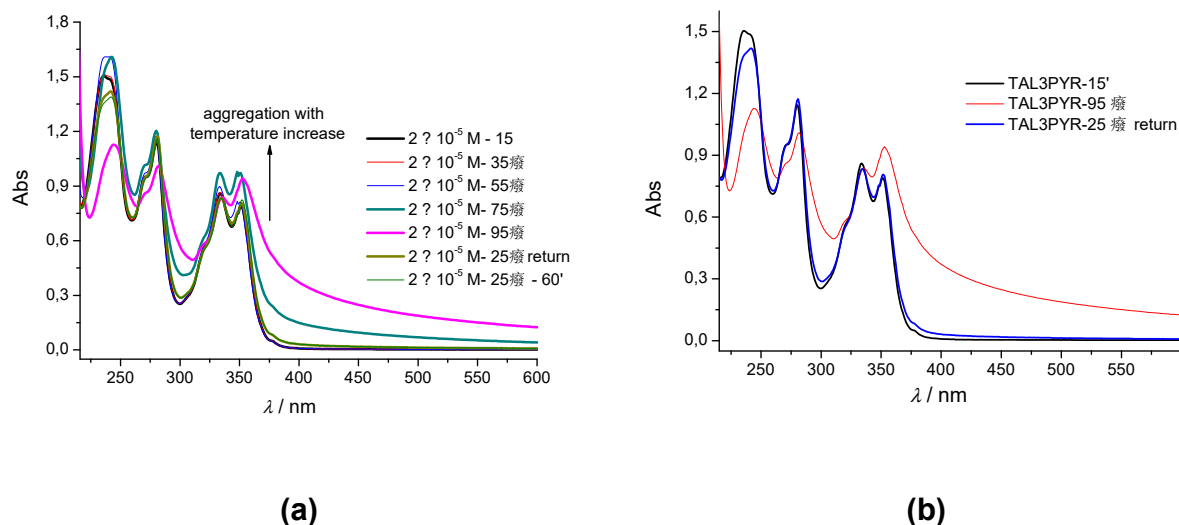

**Figure S5.** Changes of the UV/Vis spectra of **TAL3PYR** with temperature increase and upon cooling back to 25 °C (temperature range from 25 - 95 °C) at pH=7, sodium cacodylate buffer,  $I=0.05$  M.

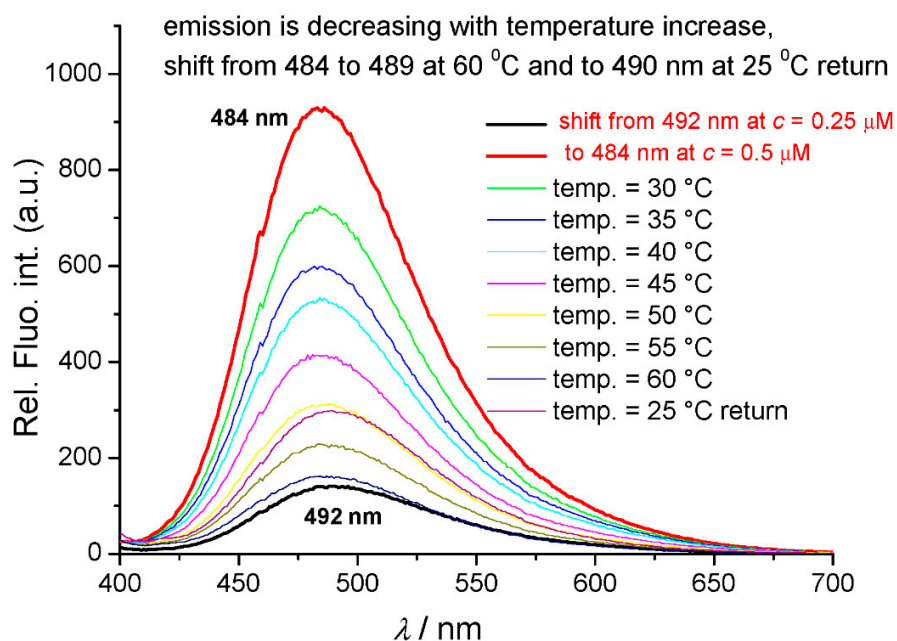

**Figure S6.** Changes of emission spectra with increase of temperature,  $c(\text{TAL3PYR})= 2.5$  and  $5 \times 10^{-7}$  M at  $\lambda_{\text{exc}}= 351$  nm, at pH=7, Na cacodylate buffer,  $I=0.05$  M.

TC-SPC (Time Correlated Single Photon Counting) measurements were performed on an Edinburgh FS5 spectrometer equipped with a pulsed LED at 340 nm. The duration of the pulse was  $\approx 1 \mu\text{s}$ . Fluorescence signals at 400 and 486 nm were monitored over 1023 channels with the time increment of  $\approx 20 \text{ ps/channel}$ . The decays were collected until they reached 3000 counts in the peak channel. A suspension of silica gel in  $\text{H}_2\text{O}$  was used as a scattering solution to obtain instrument response function (IRF). Prior to the measurements, the solutions were purged with a stream of argon for 20 min. The measurement was performed at rt ( $25^\circ\text{C}$ ). Decays of fluorescence were fit to a sum of exponentials according to equation (Fit:  $A+B_1\exp(-t/t_1)+B_2\exp(-t/t_2)+B_3\exp(-t/t_3)$ ).

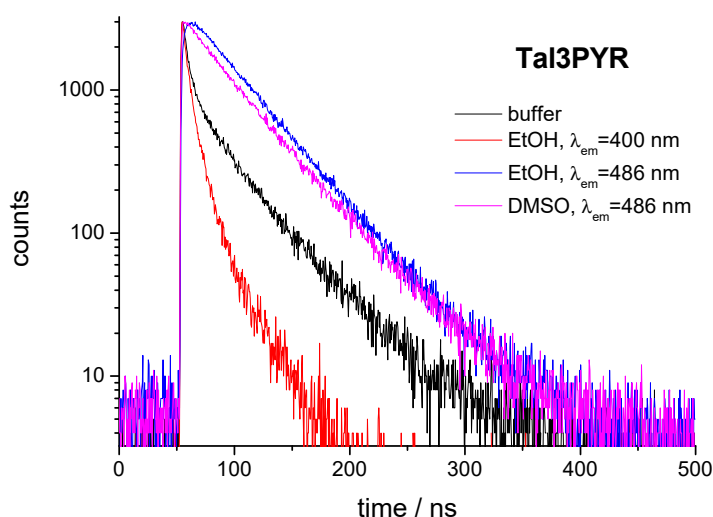

**Figure S7.** Comparison of experimental fluorescence decay traces of **Tal3PYR** under argon ( $c(\text{Tal3PYR}) = 5.0 \times 10^{-6} \text{ M}$ ; in sodium cacodylate buffer,  $I=0.05 \text{ M}$ ,  $\text{pH}=7$ ) at  $\lambda_{\text{exc}} = 351 \text{ nm}$  and  $\lambda_{\text{em}} = 400$  and  $486 \text{ nm}$ . Fitting results were obtained by reconvolution fit.

### 3. Interactions with DNA/RNA:

**Table S2.** Groove widths and depths for selected nucleic acid conformation [1,2].

| Structure type               | Groove width [Å] |       | Groove depth [Å] |       |
|------------------------------|------------------|-------|------------------|-------|
|                              | major            | minor | major            | minor |
| [a] poly rA – poly rU        | 3.8              | 10.9  | 13.5             | 2.8   |
| [b] ct-DNA (48% of GC-pairs) | 11.4             | 3.3   | 7.5              | 7.9   |
| [b] poly dAdT – poly dAdT    | 11.2             | 6.3   | 8.5              | 7.5   |
| [c] poly dGdC – poly dGdC    | 13.5             | 9.5   | 10.0             | 7.2   |

[a] A - helical structure

[b] B - helical structure

[c] B - helical structure with sterically blocked minor groove by amino groups of guanines

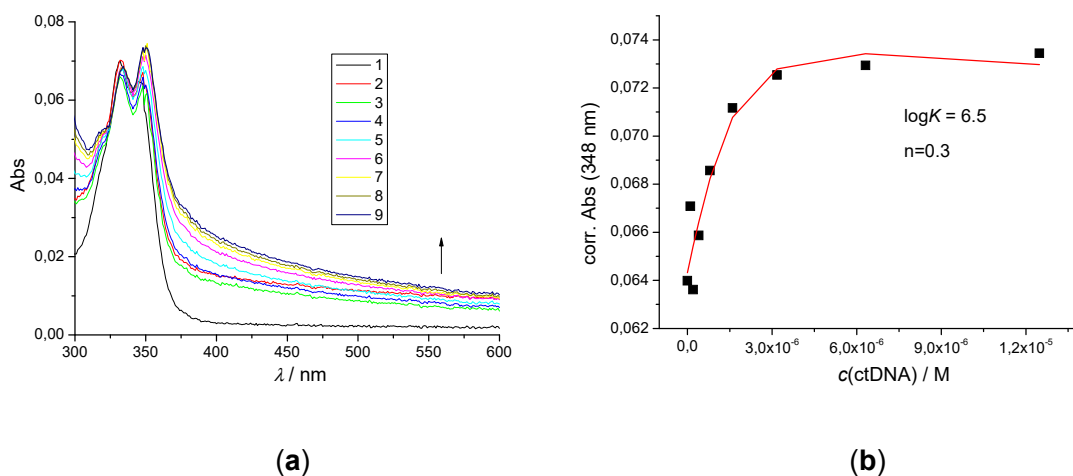

**Figure S8.** **a)** Changes in UV/Vis spectrum of **TAL3PYR** ( $c = 1.0 \times 10^{-6}$  M) upon titration with ctDNA ( $c = 1 \times 10^{-7} - 1.2 \times 10^{-5}$  M); **b)** Dependence of **TAL3PYR** absorbance at  $\lambda_{\max} = 348$  nm on  $c(\text{ctDNA})$ , at pH 7.0, sodium cacodylate buffer,  $I = 0.05$  M.



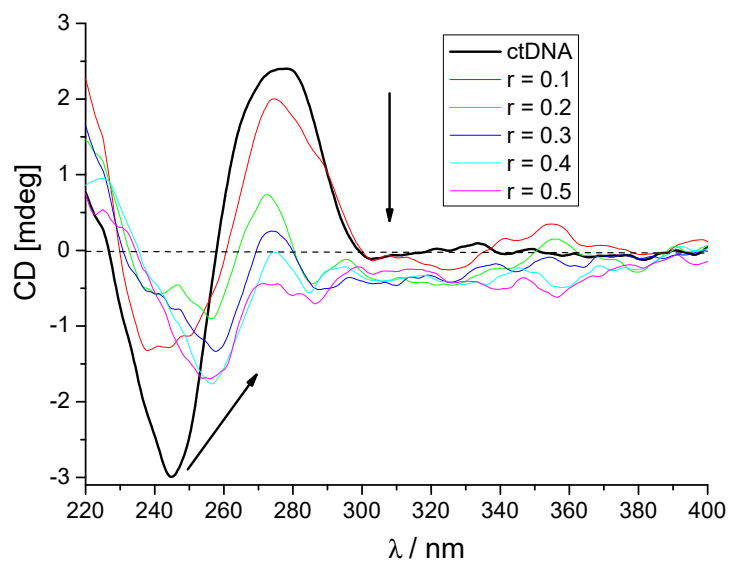

**Figure S9.** CD titration of ct-DNA ( $c = 3.0 \times 10^{-5}$  M) with **TAL3PYR** at molar ratios  $r = [\text{TAL3PYR}] / [\text{polynucleotide}]$  at pH = 7.0, buffer sodium cacodylate,  $I = 0.05$  M.

- 
1. Parish, J.H. Principles of Nucleic Acid Structure: By W Saenger. pp 556. Springer-Verlag, New York. 1984. ISBN 3-540-90761-0. Biochem. Educ. 1985, 13, 92.
  2. Cantor, C.R.; Schimmel; P.R. Biophysical Chemistry, WH Freeman and Co.: San Francisco, USA, 1980; pp. 1109-1181.
